# Supplementary material
Source: Springer Nature journal article supplement (https://www.springermedizin.de/resource/supplementary/12879_2008_807_MOESM3_ESM.pdf/9449826)

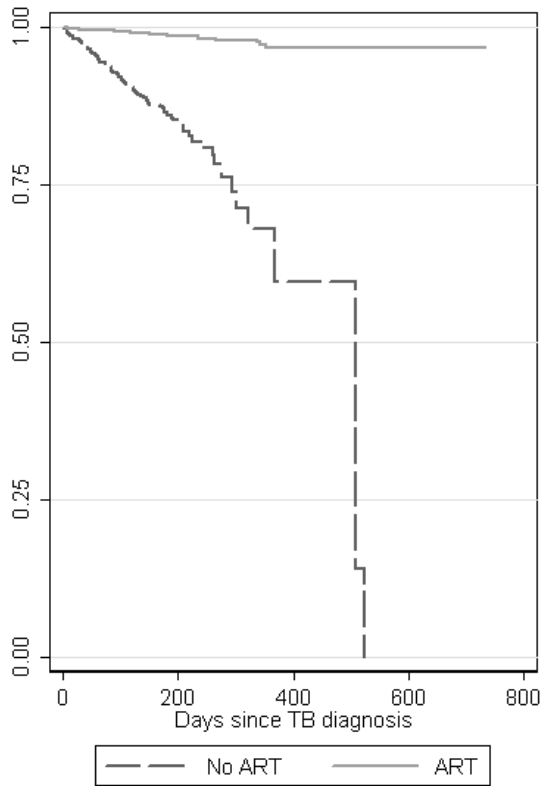

1. All TB patients

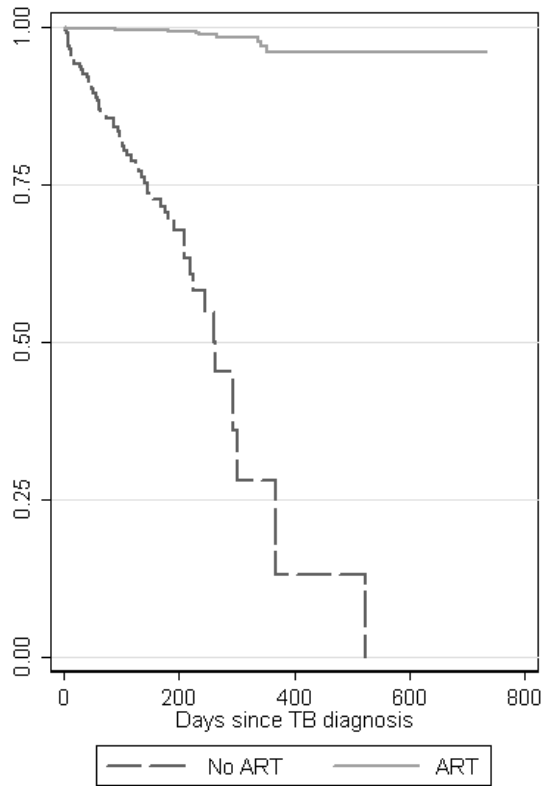

2. Bacteriological-confirmed TB

Supplement: MOESM3 [file 9449826]
